# Supplementary material for: Escherichia coli: Physiological Clues Which Turn On the Synthesis of Antimicrobial Molecules
Source: MDPI journal article supplement (doi:10.3390/vetsci7040184), 2020-11-21
Supplement: s1 [file s1]

**Table 1.** Composition of commercial and modified media used in this study, coupled with the bactericidal activity identified in these specific media, in this study, our previous studies [19, 20] and by Cameron et al, [21] and Askari and Ghanbarpour [16].

|                                                     | Agar Media                                                                                                                                                          |                                                                                   |                                                                                   |                                                                                   |                                                                                     | Liquid Media                                                                                                                                                                |                                                                                     |                                                                                       |                                                                                     |                                                                                     |
|-----------------------------------------------------|---------------------------------------------------------------------------------------------------------------------------------------------------------------------|-----------------------------------------------------------------------------------|-----------------------------------------------------------------------------------|-----------------------------------------------------------------------------------|-------------------------------------------------------------------------------------|-----------------------------------------------------------------------------------------------------------------------------------------------------------------------------|-------------------------------------------------------------------------------------|---------------------------------------------------------------------------------------|-------------------------------------------------------------------------------------|-------------------------------------------------------------------------------------|
|                                                     | MAC                                                                                                                                                                 | TSA                                                                               | MH                                                                                | PN                                                                                | LBA                                                                                 | EC                                                                                                                                                                          | TSB                                                                                 | LB                                                                                    | TSB+                                                                                | TSB/EC 50/50 w/w                                                                    |
| Composition in gram per Litre                       | Gelatin Peptone - 17                                                                                                                                                | Casein - 15<br>(Pancreatic Digest)                                                | Beef Heart Infusion - 2                                                           | Casein - 5<br>(Pancreatic Digest)                                                 | Tryptone - 10                                                                       | Casein Digest - 20                                                                                                                                                          | Tryptone - 17<br>(Casein peptone)                                                   | Tryptone - 10                                                                         | Tryptone - 17<br>(Casein peptone)                                                   | Tryptone - 8.5<br>(Casein peptone)                                                  |
|                                                     | Meat Peptone - 3                                                                                                                                                    | Soya Bean - 5<br>(Papaic Digest)                                                  | Casein Digest - 17.5                                                              | Beef Extract - 3                                                                  | Yeast Extract - 10                                                                  |                                                                                                                                                                             | Soy -3<br>(Soymeal Peptone)                                                         | Yeast Extract - 5                                                                     | Soy -3<br>(Soymeal Peptone)                                                         | Soy -1.5<br>(Soymeal Peptone)                                                       |
|                                                     |                                                                                                                                                                     |                                                                                   |                                                                                   |                                                                                   |                                                                                     |                                                                                                                                                                             |                                                                                     |                                                                                       |                                                                                     | Casein Digest - 10                                                                  |
|                                                     | Lactose - 10                                                                                                                                                        |                                                                                   | Starch - 1.5                                                                      |                                                                                   |                                                                                     | Lactose - 5                                                                                                                                                                 | Glucose - 2.5                                                                       |                                                                                       | Glucose - 2.5<br>Lactose - 5                                                        | Glucose - 1.25<br>Lactose - 2.5                                                     |
|                                                     | Bile Salts - 1.5                                                                                                                                                    |                                                                                   |                                                                                   |                                                                                   |                                                                                     | Bile Salts - 1.5                                                                                                                                                            |                                                                                     |                                                                                       |                                                                                     | Bile Salts - 0.75                                                                   |
|                                                     | Sodium Chloride - 5                                                                                                                                                 | Sodium Chloride - 5                                                               |                                                                                   |                                                                                   | Sodium Chloride - 10                                                                | Sodium Chloride - 5                                                                                                                                                         | Sodium Chloride - 5                                                                 | Sodium Chloride - 10                                                                  | Sodium Chloride - 5                                                                 | Sodium Chloride - 5                                                                 |
|                                                     | Agar - 13.5                                                                                                                                                         | Agar - 15                                                                         | Agar - 17                                                                         | Agar - 15                                                                         | Agar - 15                                                                           | Phosphate alloy - 4.5                                                                                                                                                       | Phosphate alloy - 2.5                                                               |                                                                                       | Phosphate alloy - 2.5                                                               | Phosphate alloy - 4                                                                 |
| Bactericidal activity identified in different media |                                                                                                                                                                     |                                                                                   |                                                                                   |                                                                                   |                                                                                     |                                                                                                                                                                             |                                                                                     |                                                                                       |                                                                                     |                                                                                     |
| this study                                          |   |  |  |  |  |       |  |    |  |  |
| Cameron [21]                                        |                                                                                                                                                                     |                                                                                   |  |                                                                                   |                                                                                     |                                                                                                                                                                             |                                                                                     |                                                                                       |                                                                                     |                                                                                     |
| Paquette [19]                                       |   |                                                                                   |                                                                                   |                                                                                   |                                                                                     |       |                                                                                     |                                                                                       |                                                                                     |                                                                                     |
| Paquette [20]                                       |                                                                                                                                                                     |                                                                                   |                                                                                   |                                                                                   |                                                                                     |   |                                                                                     |                                                                                       |                                                                                     |                                                                                     |
| Askari [16]                                         |                                                                                                                                                                     |                                                                                   |                                                                                   |                                                                                   |                                                                                     |                                                                                                                                                                             |                                                                                     |  |                                                                                     |                                                                                     |

\* Note: 1) Askari [19] used LB with mitomycin C to induce colicin production and for the purpose of this table, LB media without mitomycin C (as used in this study) is considered to not have induce bacteriocin production. 2) MAC also contains 0.03g of Neutral Red and 0.001g of Crystal Violet.

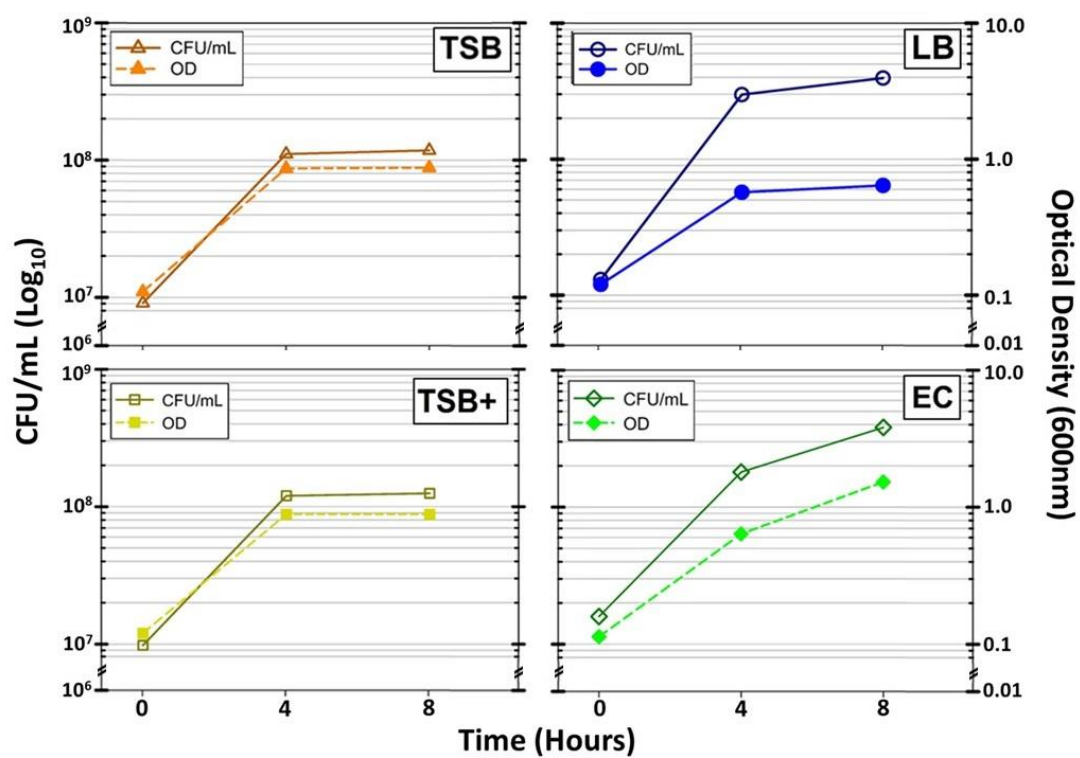

**Supplemental Figure S1.** Comparison of cell numbers versus optical density after incubation in different media at time points 0, 4 and 8 hours.
